# Supplementary material for: Magnetic amino-functionalized graphene oxide nanocomposite for PFAS removal from water
Source: Royal Society of Chemistry journal article supplement (doi:10.1039/d4va00171k), 2024-01-01
Supplement: d4va00171k1.pdf [file d4va00171k1.pdf]

## Supporting Information

for

### **Magnetic amino-functionalized graphene oxide nanocomposite for PFAS removal from water**

Shokouh Mahpishanian, Muchu Zhou, Reza Foudazi\*

*<sup>a</sup>School of Sustainable Chemical, Biological, and Materials Engineering, The University of  
Oklahoma, Norman, Oklahoma 73019, United States*

---

\*Corresponding author. Email: [rfoudazi@ou.edu](mailto:rfoudazi@ou.edu).

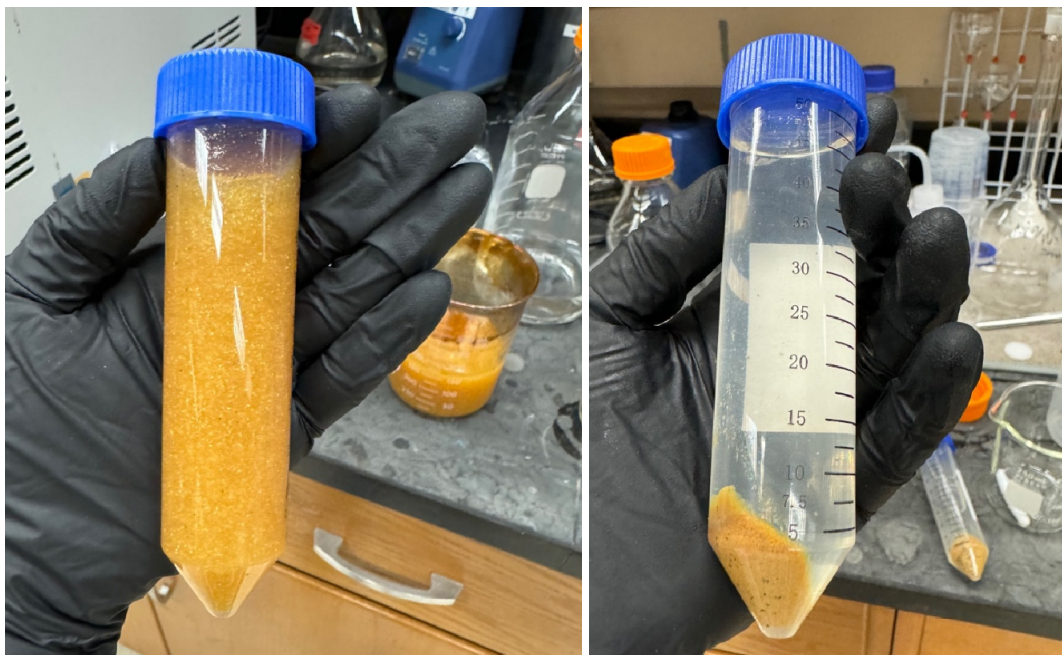

**Fig. S1.** The mixture 1 before and after the centrifugation.

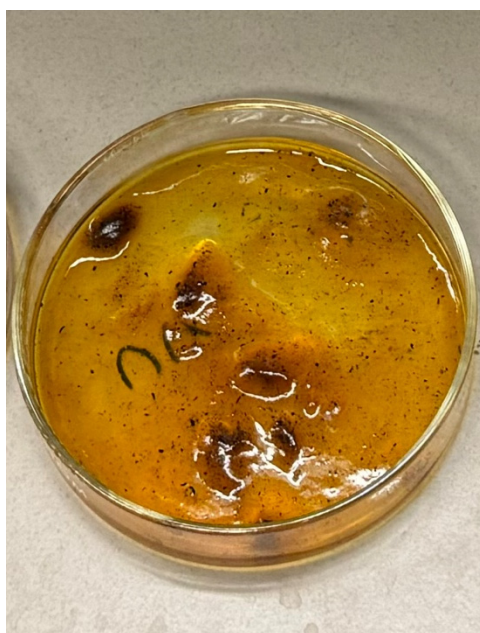

**Fig. S2.** The wet GO before vacuum drying.

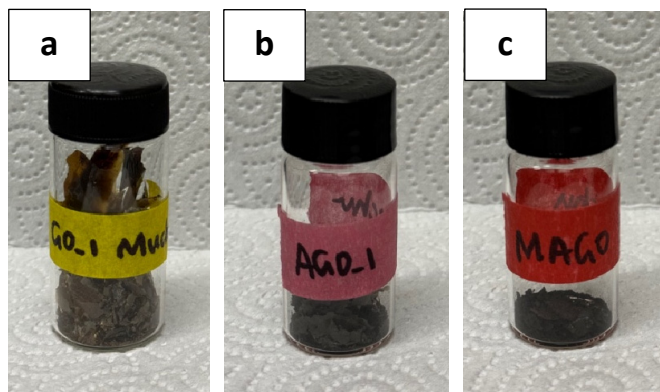

**Fig. S3.** The resultant dried (a) GO, (b) AGO, and (c) MAGO.

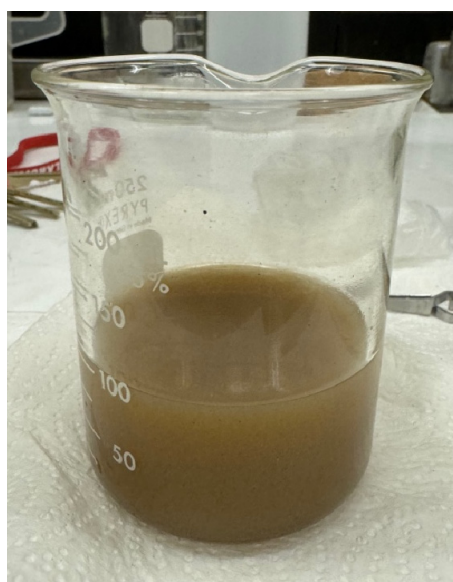

**Fig. S4.** GO dispersed in the ethanol.

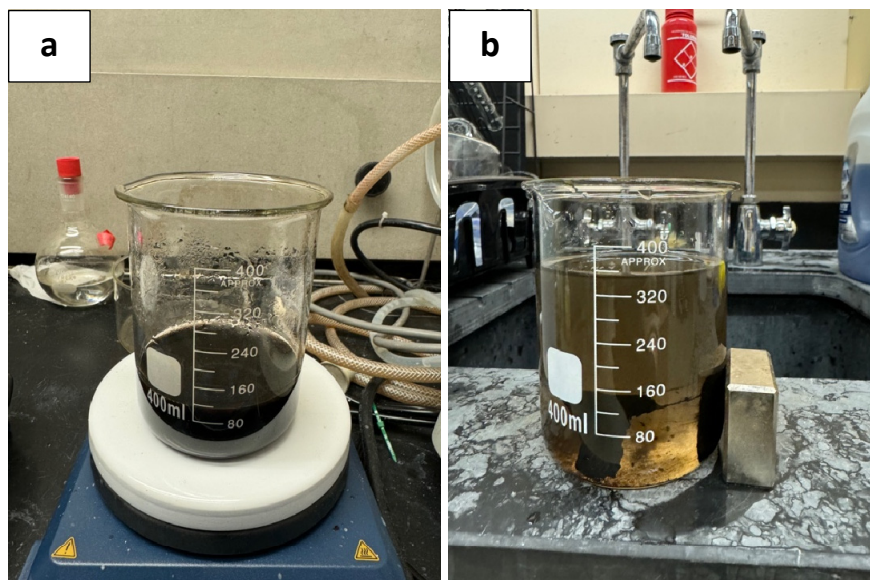

**Fig. S5.** (a) The mixture 2 after heating at 65 °C with stirring for 1 h. And (b) the separation of MAGO by using the magnet.

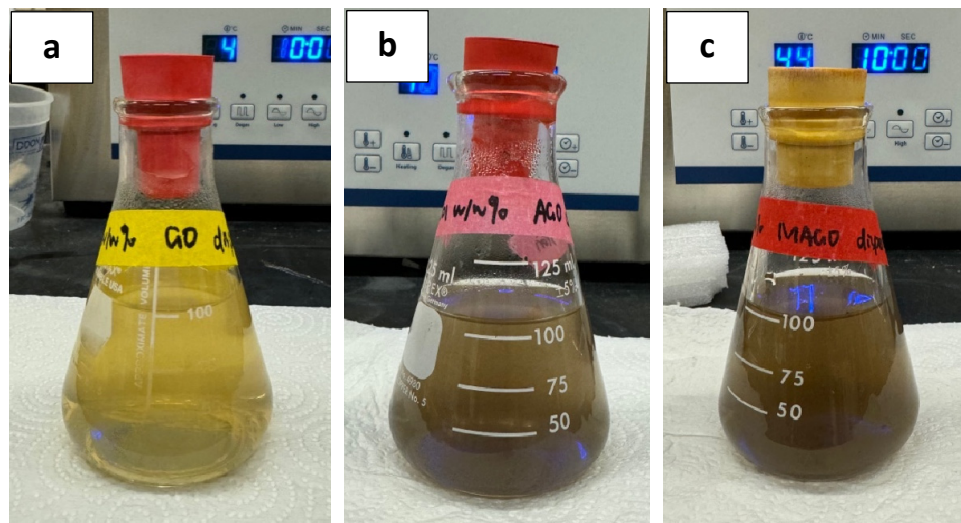

**Fig. S6.** 0.01 w/w % (a) GO, (b) AGO, and (c) MAGO dispersions after 1 h ultrasonication.

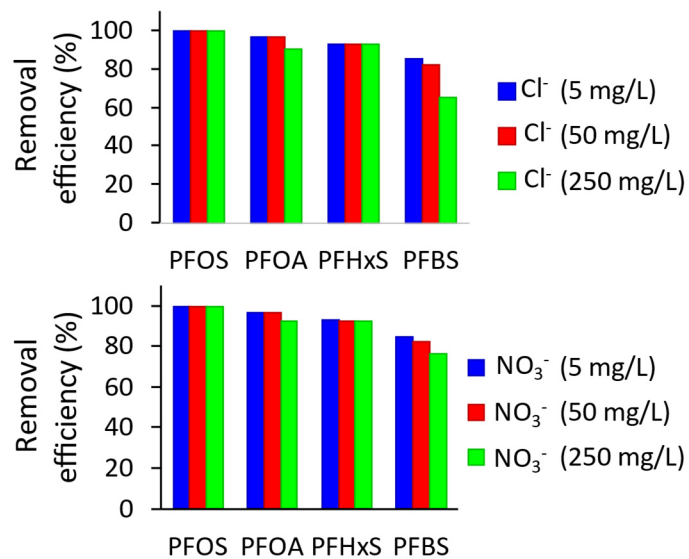

**Fig. S7.** Effect of background anions on PFAS removal efficiency.

## Data

Effect of adsorbent type

|                                | PFOS | PFOA | PFHxS | PFBS |
|--------------------------------|------|------|-------|------|
| GO                             | 55.4 | 51.7 | 40.2  | 3.6  |
| MGO                            | 67.8 | 56.1 | 49.5  | 14.4 |
| MAGO                           | 99.2 | 94.1 | 93.9  | 85.3 |
| Fe <sub>3</sub> O <sub>4</sub> | 11.4 | 11.6 | 10.7  | 15.5 |

Effect of the solution pH

| pH | PFOS | PFOA | PFHXS | PFBS |
|----|------|------|-------|------|
| 3  | 99.1 | 90.7 | 92.7  | 78.8 |
| 4  | 97.5 | 96.3 | 92.6  | 80.8 |
| 5  | 99.2 | 94.4 | 92.9  | 80.9 |
| 6  | 99.7 | 96.1 | 92.5  | 79.7 |
| 7  | 99.5 | 96.7 | 90.6  | 76.5 |
| 8  | 92.2 | 83.4 | 82.4  | 52.3 |
| 9  | 87.4 | 77.4 | 72.4  | 35.8 |

Effect of the adsorbent amount

| adsorbent (mg) | PFOS | PFOA | PFHXS | PFBS |
|----------------|------|------|-------|------|
| 5              | 78.2 | 75.5 | 68.7  | 66.8 |
| 10             | 98.5 | 96.3 | 85.6  | 79.8 |
| 15             | 99.3 | 96.9 | 91.9  | 80.3 |
| 20             | 98.9 | 96.2 | 92.5  | 79.9 |
| 25             | 99.1 | 96.8 | 92.3  | 80.6 |
| 30             | 98.8 | 94.6 | 91.8  | 79.3 |

Effect of contact time

| Time (min) | PFOS | PFOA | PFHxS | PFBS |
|------------|------|------|-------|------|
| 0          | 0    | 0    | 0     | 0    |
| 1          | 28.8 | 20.8 | 13.4  | 5.7  |
| 2          | 45.2 | 49.9 | 30.6  | 17.1 |
| 5          | 85.7 | 73.4 | 52.4  | 32.8 |
| 10         | 94.5 | 87.6 | 77.9  | 55.4 |
| 15         | 98.1 | 92.4 | 85.8  | 68.1 |
| 20         | 99.5 | 96.6 | 90.8  | 75.4 |
| 30         | 99.6 | 96.5 | 92.7  | 79.2 |
| 45         | 99.3 | 96.5 | 92.3  | 84.4 |
| 60         | 99.4 | 96.3 | 92.6  | 85.3 |

Effect of the initial concentration

| C (µg/L) | PFOS | PFOA | PFHXS | PFBS |
|----------|------|------|-------|------|
| 25       | 95.1 | 91.9 | 92.3  | 83.6 |
| 50       | 97.2 | 93.2 | 93.1  | 82.5 |
| 100      | 98.6 | 95.8 | 92.6  | 84.5 |
| 200      | 99.8 | 96.5 | 91.9  | 84.1 |
| 500      | 99.1 | 96.8 | 91.2  | 82.2 |

Effect of competing ions

|                            | PFOS | PFOA | PFHxS | PFBS |
|----------------------------|------|------|-------|------|
| Cl <sup>-</sup> (5 mg/L)   | 99.5 | 96.7 | 92.5  | 85.2 |
| Cl <sup>-</sup> (50 mg/L)  | 99.4 | 96.3 | 92.7  | 82.1 |
| Cl <sup>-</sup> (250 mg/L) | 99.6 | 90.2 | 92.5  | 65.1 |

|                                         | PFOS | PFOA | PFHxS | PFBS |
|-----------------------------------------|------|------|-------|------|
| NO <sub>3</sub> <sup>-</sup> (5 mg/L)   | 99.6 | 96.4 | 92.7  | 84.8 |
| NO <sub>3</sub> <sup>-</sup> (50 mg/L)  | 99.4 | 96.5 | 92.5  | 82.4 |
| NO <sub>3</sub> <sup>-</sup> (250 mg/L) | 99.2 | 92.1 | 92.4  | 76.3 |

Regeneration of the adsorbent

|   | PFOS | PFOA | PFHxS | PFBS |
|---|------|------|-------|------|
| 1 | 99.5 | 96.2 | 92.3  | 78.6 |
| 2 | 99.7 | 96   | 92.1  | 76.5 |
| 3 | 99.2 | 96.1 | 91.8  | 76.1 |
| 4 | 99.4 | 95.8 | 92.7  | 76.2 |
| 5 | 99.2 | 95.2 | 91.1  | 73.7 |
